# Supplementary material
Source: ML conference proceedings conference paper supplement (https://proceedings.neurips.cc/paper_files/paper/2020/hash/690f44c8c2b7ded579d01abe8fdb6110-Abstract.html)
Supplement: Supplementary file [file 690f44c8c2b7ded579d01abe8fdb6110-Supplemental.pdf]

---

# Supplementary

## Geo-PIFu: Geometry and Pixel Aligned Implicit Functions for Single-view Human Reconstruction

---

Tong He<sup>1</sup>, John Collomosse<sup>2,3</sup>, Hailin Jin<sup>2</sup>, Stefano Soatto<sup>1</sup>  
<sup>1</sup>UCLA. <sup>2</sup>Creative Intelligence Lab, Adobe Research. <sup>3</sup>CVSSP, University of Surrey, UK.  
{simpleig,soatto}@cs.ucla.edu {collomos,hljjin}@adobe.com

### 1 Implementation Details

Implementation details like network architectures, training/test scripts, pre-trained models, evaluation protocols and *etc.* can be found here <https://github.com/simpleig/Geo-PIFu>. Please check the README.md for step by step instructions.

### 2 More Results

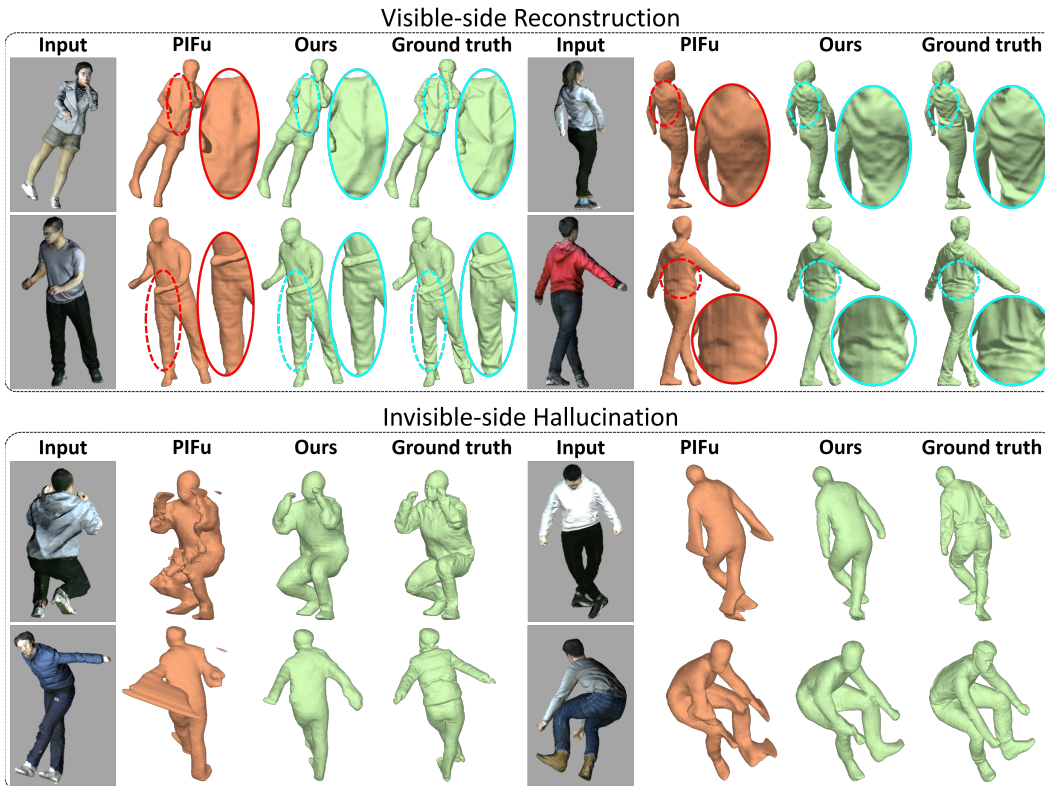

Figure 1: Single-view clothed human mesh reconstruction. Our results have less shape artifacts and distortions than PIFu. PIFu lacks global robustness when hallucinating invisible-side meshes of complex poses and large self-occlusion. Besides improved global regularities and better alignment with ground truth, our meshes also contain more accurate and clear local surface details than PIFu.

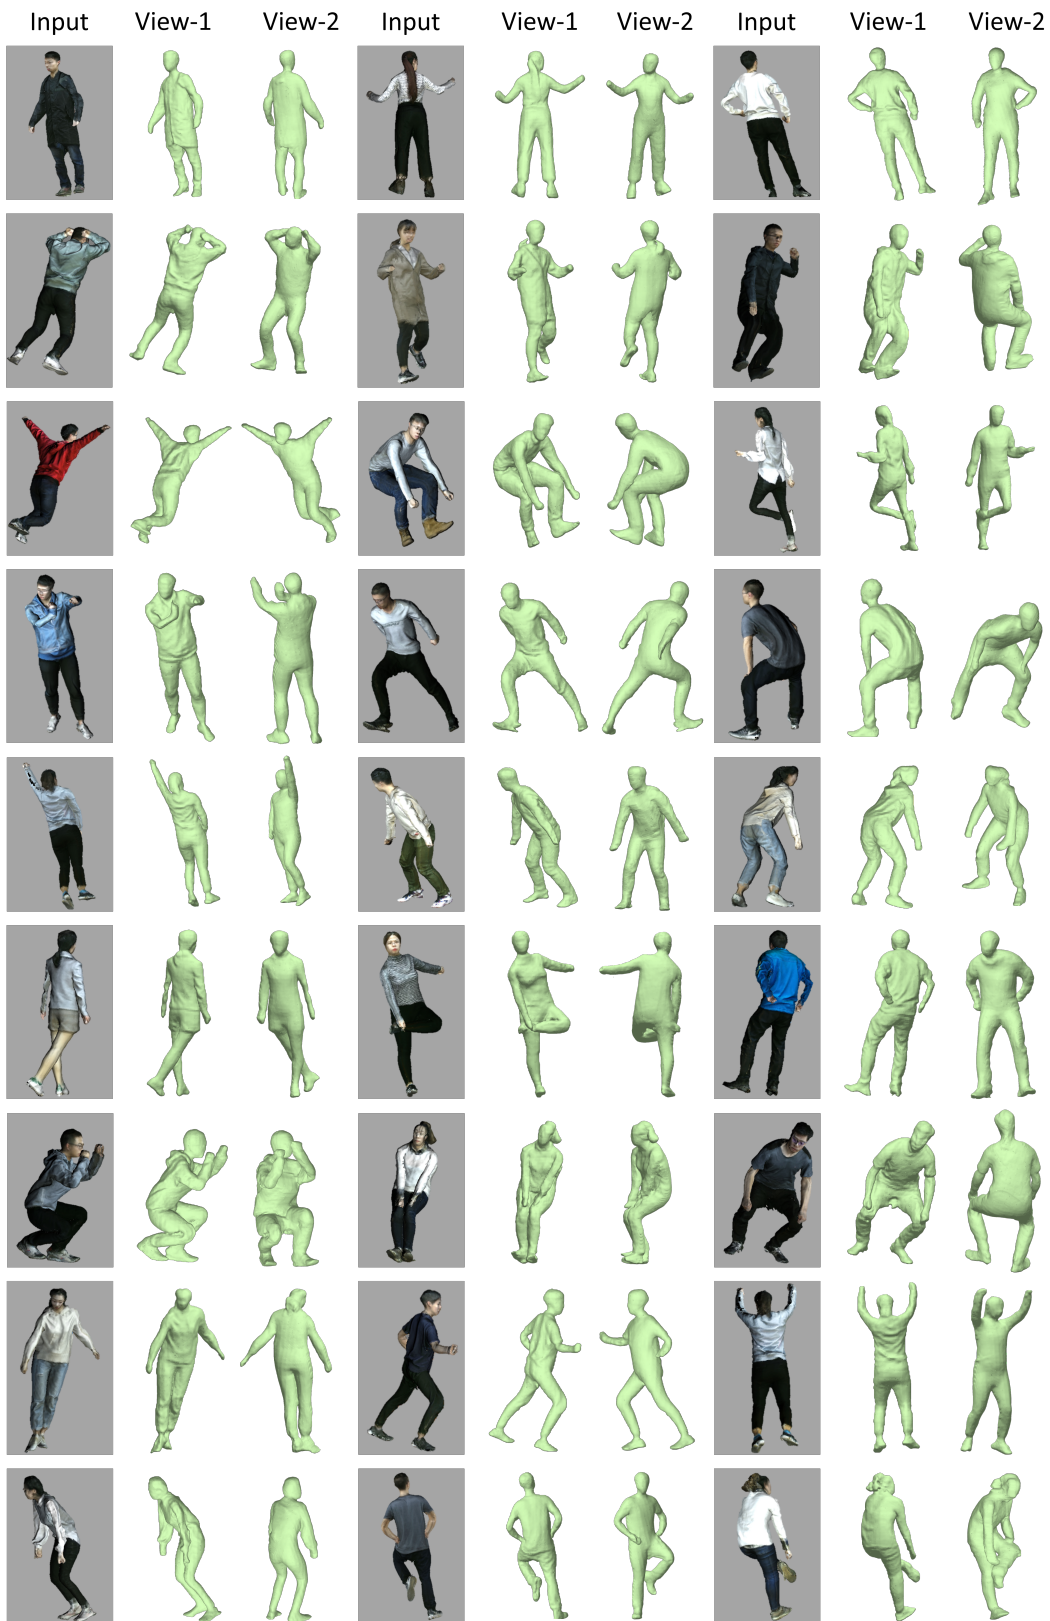

Figure 2: Single-view clothed human mesh reconstruction of our method Geo-PIFu.
